# Supplementary material
Source: PubMed Central journal article supplement (PMC2852239)
Supplement: kxp050_1.pdf [file kxp050_1.pdf]

## Supplementary material to Confidence intervals that match Fisher's exact or Blaker's exact tests

MICHAEL P. FAY

*National Institute of Allergy and Infectious Diseases,  
Bethesda, MD 20892-7609, USA  
mfay@niaid.nih.gov*

### SUMMARY

Here is an outline of the supplement. In Section 1 we give detailed background on the setup of the problem introducing notation. In Section 2 we review of the three exact conditional tests. In Section 3 we review Blaker's algorithm, show why its precision is unclear, and provide a new algorithm with clearer precision. In Section 4 we explore the extent of the test-CI inconsistency problem for all tables with sample sizes between 5 and 20 inclusive. Finally, in Section 5 we return to the Lim, and others (2009) example, giving some review of the properties of the three exact conditional tests.

### 1. OUTLINE OF THE PROBLEM

For the  $2 \times 2$  table, we use the model with  $\mathbf{X} = [X_0, X_1]$ , where  $X_i \sim \text{Binomial}(n_i, \pi_i)$  and are independent of each other and the  $n_i$  are fixed and known. There are other models for the  $2 \times 2$  table but for most it is reasonable to condition on the marginals so that inferences can be calculated from Fisher's noncentral hypergeometric distribution as we do here (see e.g., Lehmann and Romano, 2005, or Yates, 1984). Unconditional tests are not discussed in this paper, and for a comparison of the two types of tests see Agresti (2001) and the references cited there. For this paper the parameter of interest is the odds ratio,  $\beta = \frac{\pi_1(1-\pi_0)}{\pi_0(1-\pi_1)}$ , and the nuisance parameter is  $\psi = \pi_0 + \pi_1$ . The distribution of  $\mathbf{X}$  is completely described by the parameter vector  $\theta = [\beta, \psi]$ .

We are interested in confidence intervals about  $\beta$ , so we consider the family of two-sided hypothesis tests indexed by  $\beta_0$  where the hypotheses are:

$$H_0 : \beta = \beta_0$$

$$H_1 : \beta \neq \beta_0.$$

The usual application only considers the case where  $\beta_0 = 1$ . In Section 2 we discuss three families of tests associated with these hypotheses. For any of these three families, let  $p_{\beta_0}(\mathbf{x})$  be the two-sided p-value associated the null  $H_0 : \beta = \beta_0$ , where we reject when  $p_{\beta_0}(\mathbf{x}) \leq \alpha$ . A conceptually simple way to create confidence sets from any family is to invert the tests, so that the  $100(1 - \alpha)\%$  confidence set is (see e.g., Casella and Berger, 2002):

$$C(\mathbf{x}, 1 - \alpha) = \{\beta : p_{\beta}(\mathbf{x}) > \alpha\}. \quad (1.1)$$

The confidence set given by equation 1.1 is said to be *strongly consistent* with the family of tests, since the  $100(1 - \alpha)\%$  confidence interval does not contain  $\beta_0$  if and only if the  $\alpha$ -level test corresponding to  $H_0 : \beta = \beta_0$  rejects. We call this confidence set the *inversion* of the family of tests. Since the inversion is not guaranteed to be an interval (see Blaker, 2000 or Section 3.1), we use the matching interval defined in the main paper.

## 2. THREE TWO-SIDED EXACT CONDITIONAL TESTS FOR $2 \times 2$ TABLES

### 2.1 Preliminaries

Each of the null hypotheses in the family of hypotheses described by equation 1.1 is a point hypothesis in terms of  $\beta$ . If we condition on  $X_0 + X_1$ , the sufficient statistic for  $\psi$ , then we obtain a likelihood without  $\psi$  terms:

$$Pr[X_1 = x | \beta] = f_{\beta}(x) = \frac{\binom{n_1}{x} \binom{n_0}{k-x} \beta^x}{\sum_{i=x_{min}}^{x_{max}} \binom{n_1}{i} \binom{n_0}{k-i} \beta^x}, \text{ for } x \in [x_{min}, x_{max}],$$

where  $k = x_0 + x_1$ ,  $x_{min} = \max(0, n_0 - k)$  and  $x_{max} = \min(k, n_1)$ . This distribution is Fisher's non-central hypergeometric distribution (see e.g., Fog, 2008).

Once we condition on the marginals, the table is completely described by  $x_1$ , and smaller values of  $x_1$  suggest smaller odds ratios. Since we are only considering non-randomized tests, there is only one commonly used exact one-sided test, the one-sided Fisher's exact test, and it is based on the ordering of  $x_1$ . The exact versions of other non-randomized historical one-sided tests are constructed this way and are all equivalent (see Davis, 1986 or StatXact 8 Procs Manual, 2007).

## 2.2 Central Fisher's Exact Test

The one-sided Fisher's exact tests have p-values of either

$$p_{\beta}^{(lte)}(\mathbf{x}) = \sum_{i:i \leq x_1} f_{\beta}(i)$$

or

$$p_{\beta}^{(gte)}(\mathbf{x}) = \sum_{i:i \geq x_1} f_{\beta}(i),$$
(2.1)

and we can create a two-sided test with p-value equal to

$$p_{\beta}(\mathbf{x}) = \min \left[ 1, 2 * \min \left\{ p_{\beta}^{(lte)}(\mathbf{x}), p_{\beta}^{(gte)}(\mathbf{x}) \right\} \right]$$
(2.2)

This doubling of the one-sided p-value is a common and simple method for defining the two-sided p-value (Gibbons and Pratt, 1975).

The inversion of this test is an interval because the one-sided p-values given in equations 2.1 are unimodal in  $\beta$ . Unimodality follows from the monotonicity in  $\beta$  of each side (see the Appendix of Mehta, Patel, and Gray, 1985) and equation 2.2. The matching interval is the exact conditional tail interval (ECTI) (Cornfield, 1956, see also Agresti and Min, 2001). Specifically, let the ECTI be  $C(\mathbf{x}, 1 - \alpha) = [L(x_1), U(x_1)]$  which are the solutions to (see e.g., StatXact 8 Procs Manual):

$$L(x_1) = \begin{cases} 0 & \text{if } x_1 \text{ is } x_{min} \\ \{\beta : \sum_{i:i \geq x_1} f_{\beta}(i) = \alpha/2\} & \text{otherwise} \end{cases}$$

$$U(x_1) = \begin{cases} \infty & \text{if } x_1 \text{ is } x_{max} \\ \{\beta : \sum_{i:i \leq x_1} f_{\beta}(i) = \alpha/2\} & \text{otherwise} \end{cases}$$
(2.3)

This is a central interval meaning that we can bound the probability that the true  $\beta$  is less than the lower interval by  $\alpha/2$  and similarly for the upper interval. Because of this property we call the test associated with the  $p_{\beta}(\mathbf{x})$  of equation 2.2 the *central* Fisher's exact test. The test is also known as twice the one-sided Fisher's exact test.

## 2.3 Two-sided Fisher's Exact Test

The usual p-value associated with the two-sided Fisher's exact test is not the central one mentioned in the previous subsection but,

$$p_{\beta}(\mathbf{x}) = \sum_{i:f_{\beta}(i) \leq f_{\beta}(x_1)} f_{\beta}(i)$$
(2.4)

This p-value uses the "principal of minimum likelihood", which has little formal motivation and can lead to absurd inferences in some situations (Gibbons and Pratt, 1975). However, in the case of the conditional test on the  $2 \times 2$  table, the principle of minimum likelihood gives reasonable answers because for fixed  $\beta$  the non-central hypergeometric distribution is unimodal in the  $x_1$  values so that the values of  $x_1$  in which

we fail to reject will always be a set of consecutive integers (see e.g., Liao and Rosen, 2001).

Based on common current usage (see R help for `fisher.test`, SAS help for Proc Freq, and StatXact manual), we will call this test *the* two-sided Fisher's exact test, despite the fact that Fisher himself appeared to prefer the central Fisher's exact test (Yates, 1984, p. 444).

The inversion of this test may not be an interval, because of the p-value function of equation 2.4 may not be unimodal in  $\beta$  (see Section 3 below).

#### 2.4 Blaker's Exact Test

An alternative method for creating a two-sided p-value is to add to the smaller of the one-sided p-values "an attainable probability in the other tail which is as close as possible to the one tailed P-value obtained" (Gibbons and Pratt, 1975). To maximize power, we define the *Blaker p-value* (see Blaker, 2000) as the two-sided p-value which adds to the smaller one-sided one the largest tail probability in the opposite tail which is less than or equal to the observed tail (see equations 2.5 or 3.1). We call the resulting test, Blaker's exact test. From first principles, this is as reasonable if not more reasonable (see Gibbons and Pratt, 1975) as using the principle of minimum likelihood as is done with Fisher's two-sided exact test. In the  $2 \times 2$  table case the two-sided Fisher exact p-values will for many null hypotheses in the family coincide with the Blaker p-values. When the two p-values do not coincide, and when the principle of minimum likelihood may lead the two-sided Fisher to add more probability in the opposite tail than the observed one, it is hard to see how this is desired over the smaller p-values of Blaker. We know of no commonly used statistical property for which the two-sided Fisher's exact test performs better than Blaker's exact test, and the greatest reasons for using the former test may be tradition and ease of explanation.

Blaker (2000, see also Blaker and Spjøtvoll, 2000) showed that the p-value described above can be written in the following way. Let  $F_\beta(x) = Pr[X_1 \leq x \mid \beta]$ ,  $\bar{F}_\beta(x) = Pr[X_1 \geq x \mid \beta]$ , and  $\gamma(x, \beta) = \min\{F_\beta(x), \bar{F}_\beta(x)\}$ , then the p-value (also called the acceptability function) of Blaker (2000) is

$$p_\beta(\mathbf{x}) = Pr[\gamma(X_1, \beta) \leq \gamma(x_1, \beta)]. \quad (2.5)$$

As with the two-sided Fisher's exact test the inversion of the test is a confidence set which may not be an interval since  $p_\beta(\mathbf{x})$  of equation 2.5 is not necessarily unimodal in  $\beta$ .

### 3. CALCULATION OF INTERVALS FOR NON-UNIMODAL P-VALUE FUNCTIONS

Blaker (2000) gives an algorithm for calculating confidence intervals using the acceptability function applied to a single binomial parameter, but we show here that the bounds on the precision from algorithms of that type are not clear. Baptista and Pike (1977) give an algorithm for calculating the confidence interval that is the inversion of the two-sided Fisher's exact test, although they did not mention the cases when the confidence set is not an interval, and their algorithm will have similar precision ambiguity. In this section, we first point out the problem with Blaker's algorithm, then give an algorithm for which we may calculate the confidence interval to within some prespecified tolerance level.

### 3.1 Motivation

To show the non-unimodality in  $\beta$  of the p-value function for the two-sided Fisher's exact test and Blaker's exact test, consider an invented example of a  $2 \times 2$  table where one group has  $7/262=2.67\%$  (i.e., 7 events out of 262 at risk) while the other group has  $30/494=6.07\%$ . We plot the p-values for the three tests in Figure 1. The confidence set created by inverting the family of two-sided Fisher's exact tests is not a confidence interval: the resulting 95% confidence set is  $\{\beta : \beta \in (0.177, 0.993) \text{ or } \beta \in (1.006, 1.014)\}$ . Similar observations have been made previously (see Blaker, 2000, Vos and Hudson, 2008). We see that for  $\beta_0 = 1$  for the two-sided Fisher's exact test the p-value is significant at the 0.05 level,  $p_1(\mathbf{x}) = 0.04996$ , but for slightly larger or smaller  $\beta_0$  the p-value is not significant,  $p_{1.01}(\mathbf{x}) = 0.05006$  and  $p_{0.99}(\mathbf{x}) = 0.05005$ . Blaker's exact test can also have this problem, although in this case  $p_{1.01}(\mathbf{x}) = 0.0354$  for Blaker's test. The problem is the non-unimodality of the p-value function. Note that this non-unimodality is not a problem for the central Fisher's exact test, and that is why the ECTI are much easier to calculate and have been the default exact intervals in standard software.

Blaker (2000) gave a simple algorithm for the calculation of the confidence interval for the single binomial parameter using his acceptability function. We describe a similar algorithm pictorially applied to the invented data mentioned above, and here we choose  $\alpha = 0.0501$  to demonstrate a potential problem with the algorithm. The algorithm is to calculate  $p_\beta(\mathbf{x})$  for different values of  $\beta$  at equal intervals, starting from an extreme value, moving towards  $\beta = 1$ , and stopping when  $p_\beta(\mathbf{x}) > \alpha$ . The points in Figure 2 show the two-sided Fisher's exact p-value calculated at  $1 \pm j * 0.002, j = 0, 1, 2, \dots$ . The solid points are the ones above  $\alpha$ . Other p-values measured to the right of the last open circle are below the range of the vertical axis, so that the largest calculated odds ratio that gives p-values greater than  $\alpha$  is 0.986. The actual upper value of the matching confidence interval is 1.0138 since that is the largest  $\beta_0$  such that  $p_{\beta_0}(\mathbf{x}) > \alpha$ . Thus, although the p-values are measured every 0.002 the error in the upper limit calculated this way is over ten times larger than 0.002 since  $1.0138 - 0.9860 = 0.0278$ .

### 3.2 Algorithm

First consider the Blaker confidence interval. Recall that  $p_\beta(\mathbf{x})$  for Blaker's exact test is the sum of two tails of Fisher's non-central hypergeometric distribution, the observed tail and the opposite tail that is closest to but not greater than the observed tail. Note that  $F_\beta(x)$  is decreasing in  $\beta$  for all fixed  $x$  in  $\{x_{min}, \dots, x_{max} - 1\}$  (Mehta, Patel, and Gray, 1985), and it is increasing in  $x$  for  $0 < \beta < \infty$  and fixed. Since  $\bar{F}_\beta(x) = 1 - F_\beta(x - 1)$ , we have similar relationships but reversed directions for  $\bar{F}_\beta(x)$ . Thus, we can write  $p_\beta(\mathbf{x})$  for Blaker's exact test as a series of segments, each of which is the sum of an increasing function of  $\beta$  plus a decreasing function of  $\beta$ . This allows us to calculate bounds on  $p_\beta(\mathbf{x})$ .

Here are the details. Let

$$b(x_a, x_b) = \{\beta : F_\beta(x_a) = \bar{F}_\beta(x_b)\}$$

with  $b(x_1, x_{max} + 1) \equiv \infty$  and  $b(x_{min} - 1, x_1) \equiv 0$ , and let  $F_\beta(x) = 0$  when  $x < x_{min}$  and  $\bar{F}_\beta(x) = 0$

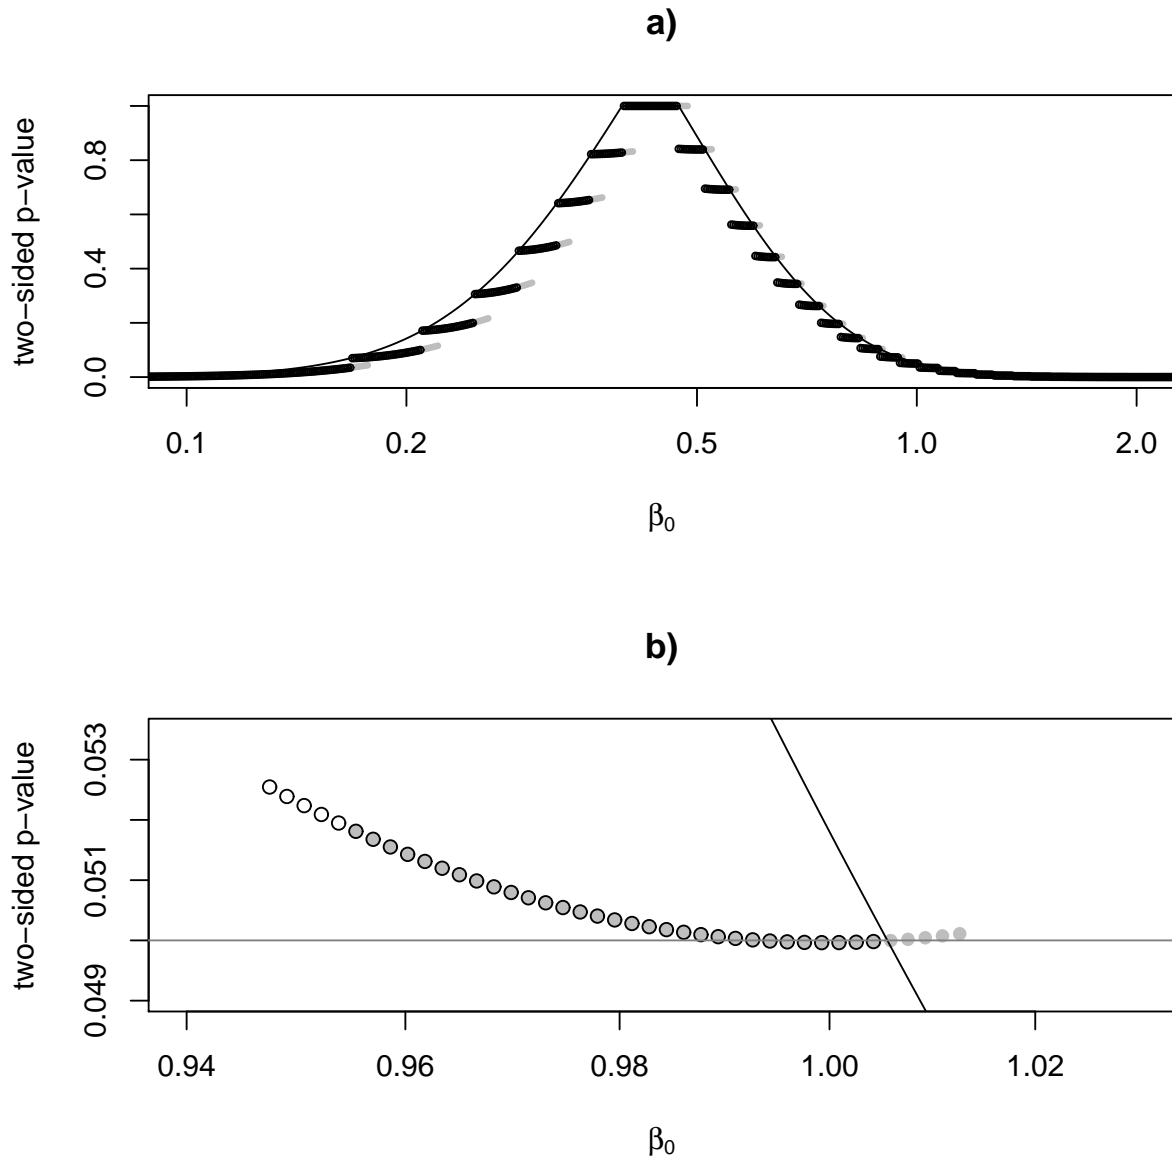

Fig. 1. P-values from the three two-sided exact tests for testing  $\beta = \beta_0$  for different values of  $\beta_0$ . Solid gray dots (appearing as thick gray lines in Figure a) are two-sided Fisher's exact test, black open dots (appearing as thick black lines in Figure a) are Blaker's exact test, and gray dots outlined in black (appearing as thick black lines in Figure a) are where those two p-values are equal. The thin black line is the central Fisher's exact, the horizontal gray line is the reference line at 0.05. Figure b is a blow-up of a portion of Figure a.

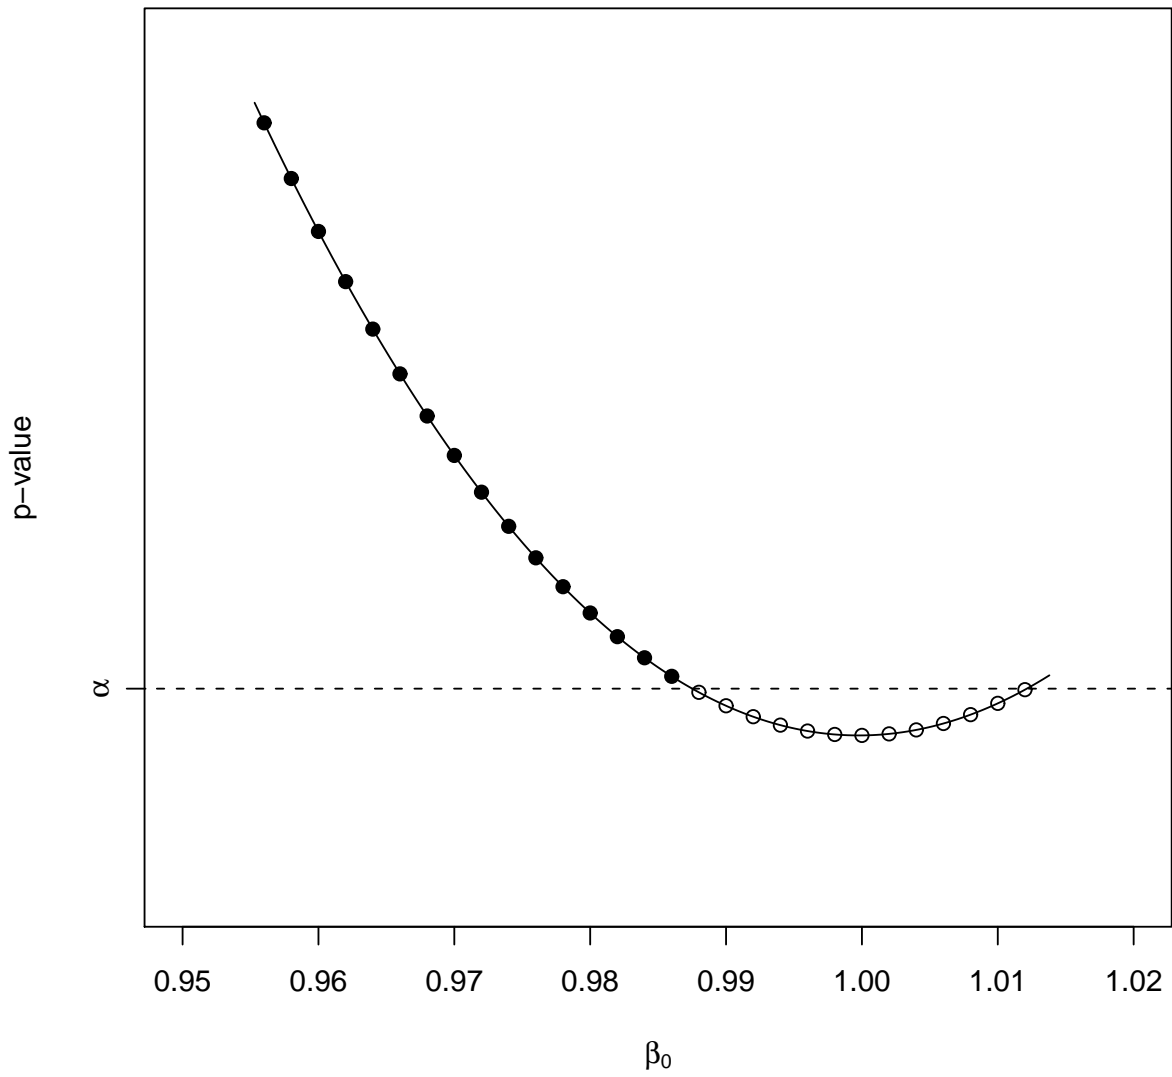

Fig. 2. Figure to show difficulty with Blaker's algorithm. P-values evaluated at the points,  $1 \pm j * 0.002, j = 0, 1, \dots$

when  $x > x_{max}$ . Then we can write Blaker's p-value function as

$$p_b(\mathbf{x}) = \begin{cases} F_b(x) + \bar{F}_b(x_1) & \text{for } b(x-1, x_1) < b \leq b(x, x_1); x = x_{min}, \dots, x_1 - 1 \\ 1 & \text{for } b(x_1 - 1, x_1) \leq b \leq b(x_1, x_1 + 1) \\ F_b(x_1) + \bar{F}_b(x) & \text{for } b(x_1, x) \leq b < b(x_1, x + 1); x = x_1 + 1, \dots, x_{max} \end{cases} \quad (3.1)$$

Figure 3 helps to explain the Blaker p-value.

For calculating bounds on the error in estimating  $p_b(\mathbf{x})$ , we first assume that the error in calculating  $F_b(x)$  and  $\bar{F}_b(x)$  is small enough that it can be ignored, i.e., it is much smaller than the desired tolerance of the limits denoted  $\delta$ . Because of the monotonicity in  $b$  of both  $F_b(x)$  and  $\bar{F}_b(x)$ , for all  $b \in (a_1, a_2)$  where  $b(x_1, x_1 + j) < a_1 < a_2 \leq b(x_1, x_1 + j + 1)$ , we have

$$\underline{P}(a_1, a_2) \equiv F_{a_1}(x_1) + \bar{F}_{a_2}(x_1) \leq p_b(\mathbf{x}) \leq F_{a_2}(x_1) + \bar{F}_{a_1}(x_1) \equiv \bar{P}(a_1, a_2)$$

We can use these bounds to create an algorithm that can either find the confidence limits to within some pre-specified tolerance level,  $\delta$ , or output bounds on those confidence limits. Here is an outline of an algorithm to calculate the upper  $100(1 - \alpha)$  percent Blaker confidence limit, say  $U$ :

1. Set  $i = 1, j = x_{max}, N = N_{div}$ , where  $N_{div}$  is a positive integer greater than 1.
2. If  $x_1 = x_{max}$  then set  $U = \infty$  and stop. Otherwise, calculate  $b_{low} = b(x_1, j)$ . If  $F_{b_{low}}(x_1) > \alpha$  set  $U$  equal to the root,  $b$ , where  $F_b(x_1) = \alpha$ , which can be found using a numeric root function (e.g., `uniroot` in R).
3. Let  $b_{low} = b(x_1, j)$  and calculate  $b_{hi} = b(x_1, j - 1)$  using a numeric root function.
4. If  $b_{hi} - b_{low} < \delta$ , set  $U = b_{hi}/2 + b_{low}/2$  and stop. Otherwise continue.
5. If  $\bar{P}\{b_{low}, b_{hi}\} \leq \alpha$ , decrease  $j$  by 1 and go to step 3. If  $\underline{P}\{b_{low}, b_{hi}\} > \alpha$ , set  $U = b_{hi}$  and stop. Otherwise continue.
6. Divide up the interval  $(b_{low}, b_{hi}]$  into  $N$  pieces where the  $i$ th piece is  $(a_{i-1}, a_i]$  and  $a_0 = b_{low}$  and  $a_N = b_{hi}$ . Calculate  $\bar{P}$  and  $\underline{P}$  for each piece. If all the  $\bar{P}$  values are less than or equal to  $\alpha$  decrease  $j$  by 1 and go to step 3. If all the  $\underline{P}$  values are greater than  $\alpha$ , set  $U = b_{hi}$  and stop. Otherwise continue.
7. If any  $\bar{P}(a_{\ell-1}, a_\ell) > \alpha$ , set  $b_{hi}$  equal to the maximum of any  $a_\ell$  such that  $\bar{P}(a_{\ell-1}, a_\ell) > \alpha$ . If any  $\underline{P}(a_{\ell-1}, a_\ell) > \alpha$  set  $b_{low}$  equal to the maximum  $a_\ell$  of any  $a_\ell$  such that  $\underline{P}(a_{\ell-1}, a_\ell) > \alpha$ , otherwise  $b_{low}$  remains unchanged. Increase  $N$  to  $2N$ , and increase  $i$  by 1. If  $i < I_{max}$  go to step 6, if not set  $U = b_{low}/2 + b_{hi}/2$  and output  $(b_{low}, b_{hi}]$  as bounds on the limit and if  $b_{hi} - b_{low} > \delta$  give a warning that the tolerance level was not reached.

A similar algorithm could be used for the lower confidence limit.

For the matching interval to the two-sided Fisher exact test, we follow the same outline, except  $b(x_a, x_b)$  is defined as

$$b(x_a, x_b) = \{\beta : f_\beta(x_a) = f_\beta(x_b)\}.$$



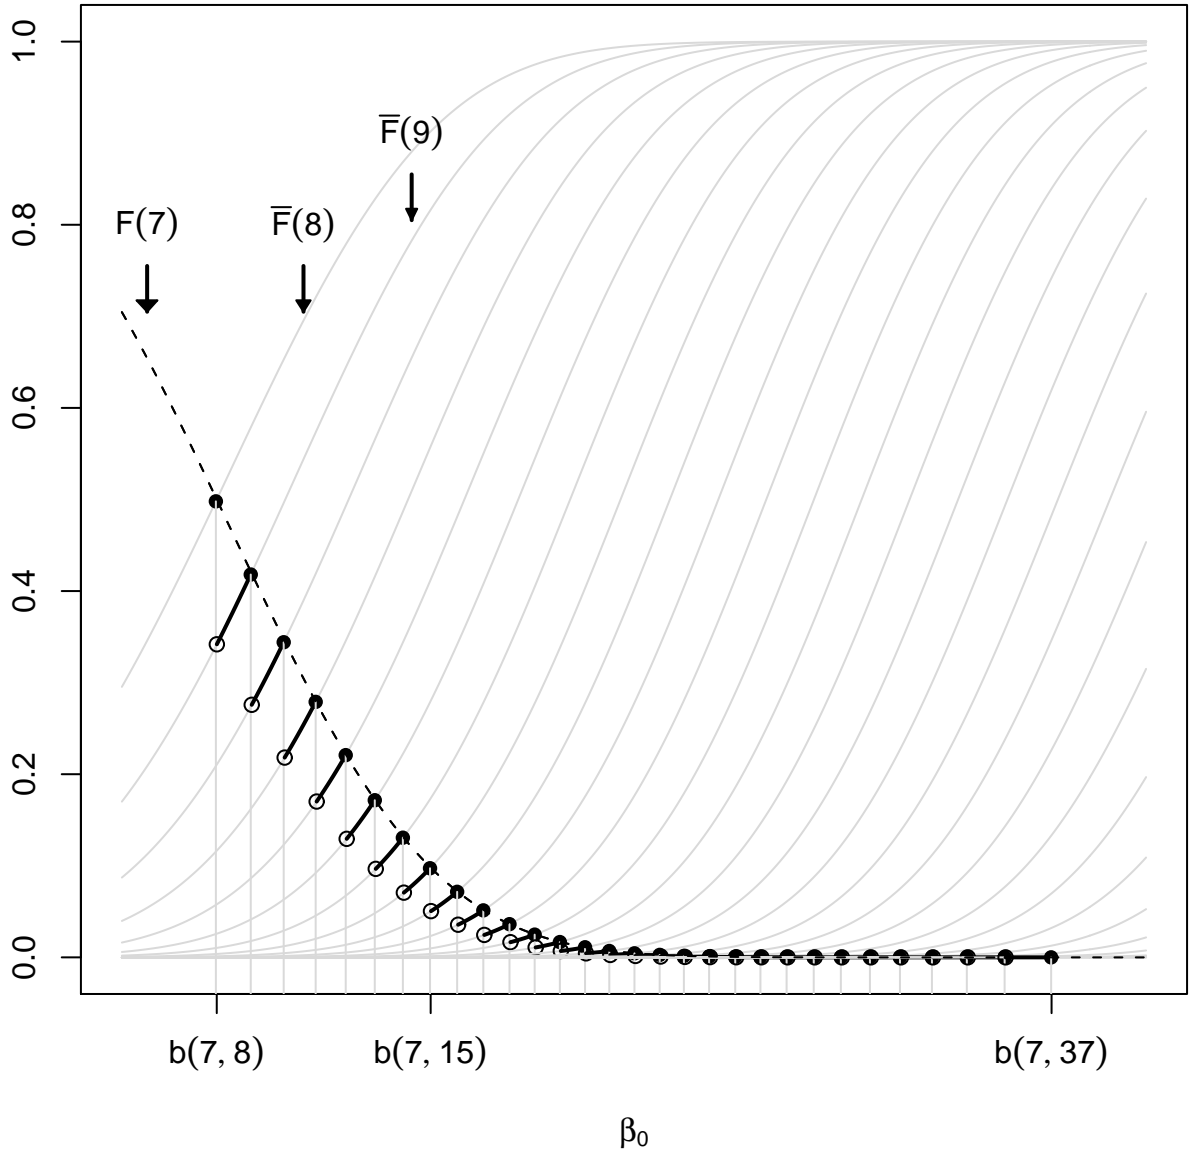

Fig. 3. Diagram of Blaker p-values for invented table. For example, in the interval  $b(7, 8) < b \leq b(7, 9)$  the p-value is the sum of the  $F_b(7)$  (the dotted line in that interval) and  $\bar{F}_b(9)$  (the solid black line segment in that interval).

This works because the non-parametric hypergeometric distribution is unimodal in  $x_1$  as can be shown by writing the ratio  $f_\beta(x)/f_\beta(x+1)$  and showing that it is a monotone function of  $x$  (see e.g., Liao and Rosen, 2001).

#### 4. THE EXTENT OF THE NON-MATCHING PROBLEM

In the data example from of Lim, et al (2009, see Table 1), there were 2 out of 16 cases where the two-sided Fisher's exact p-value implied different inferences at the 0.05 level than the ECTI. To see if this is a rare occurrence, we systematically check the frequency of this problem in this section.

Suppose we are testing  $H_0 : \beta_0 = 1$  at the 0.05 level, let  $I_p$  be the an indicator of whether the p-value from a test is less than or equal to 0.05, and let  $I_C$  be an indicator of whether the confidence interval *does not* contain 1 (i.e., implies rejection of  $H_0$ ). Define a test-CI inconsistency as any table which has  $I_p \neq I_C$ . Let the set of possible  $2 \times 2$  tables for a given  $n_0$  and  $n_1$  be called an n-set. Within each n-set, we check and see if there are any test-CI inconsistencies, if so we say that the n-set has a test-CI inconsistency.

First, we consider the situation where for  $I_p$  the p-value comes from the two-sided Fisher's exact test, and for  $I_C$  the confidence interval comes from the ECTI. Although this situation is not recommended, we study it because it appears to be the state of the current readily available software. We consider the 256 n-sets where  $n_0$  and  $n_1$  are each in  $\{5, 6, \dots, 20\}$ . Of these n-sets, 234/256 or 91.4 percent have a test-CI inconsistency. Thus, this problem is not a rare one.

Now consider the situation where each of the three tests uses its matching confidence interval. For the central Fisher's exact test, there will theoretically be no test-CI inconsistencies because the matching confidence interval is the inversion. For the two-sided Fisher's exact and Blaker's exact tests and the associated matching confidence intervals, we check the 256 n-sets of tables mentioned above through exhaustive search and find no test-CI inconsistencies. Thus, although inconsistencies between p-values and confidence intervals are possible when using the matching confidence intervals (see Figure 1b), they are not common.

#### 5. APPLICATION AND COMPARISON OF METHODS

In Table 1 we give methods described in Section 1 of the main paper (the two-sided Fisher's exact p-value, asymptotic CI and ECTI) applied to the three symptoms from Lim *and others* (2009) which present a test-CI inconsistency. In Table 2 we update Table 1 with the p-values and matching CI for the three tests. The odds ratios are the conditional maximum likelihood ones, rather than the sample odds ratios. Note that for  $\alpha = 0.05$  there are no inconsistencies between the p-values and matching confidence intervals. Our primary recommendation for this paper is that when presenting both p-values and confidence intervals, you should use the matching confidence intervals.

Before showing differences, we review some properties that all three tests share. All three tests are exact tests, meaning that the p-values are valid, and the only conservativeness of the tests is due to the

Table 1. Standard Analyses on Data from Lim, et al (2009)

| Symptom            | Table Counts |    |    |     | 2-sided<br>p-value | Odds<br>Ratio | 95% Asy |        | 95% Exact |        |
|--------------------|--------------|----|----|-----|--------------------|---------------|---------|--------|-----------|--------|
|                    | HY*          | WY | HN | WN  |                    |               | C.I.    |        | C.I.      |        |
| Tremors            | 1            | 4  | 14 | 615 | 0.113              | 10.98         | 1.15    | 104.66 | 0.21      | 119.89 |
| Vomitting/Diarrhea | 5            | 78 | 10 | 541 | 0.035              | 3.47          | 1.16    | 10.41  | 0.90      | 11.46  |
| Abdominal Pain     | 4            | 50 | 11 | 569 | 0.032              | 4.14          | 1.27    | 13.47  | 0.92      | 14.58  |

\* HY=Homozygous for CCR5 deficiency, with symptom; WY= Wild type and Heterozygous for CCR5 deficiency, with symptom; HN and WN are subjects with genetics similarly defined but without symptoms. Odds ratio is the sample odds ratio. The p-value is from the usual two-sided Fisher's exact test. The 95% asymptotic confidence interval uses the log transformation and the delta method and the 95% exact confidence interval is the ECTI.

discrete nature of the data. All three tests are nested, meaning that if a test fails to reject at the  $\alpha_1$  level then it must also fail to reject for all  $\alpha > \alpha_1$ . The matching confidence intervals are similarly nested (see Blaker, 2000). Because of the discrete nature of the data, none of the tests are unbiased. Although a randomized version of the one-side exact test is uniformly most powerful unbiased (Tocher, 1950), as is typically done in applications, we only consider non-randomized tests.

Whenever the central Fisher's exact test rejects, then Blaker's exact test also rejects, but not vice versa. Thus, Blaker's exact test is always more powerful than the central Fisher's exact test (see Figure 1). Blaker showed this result except with more generality (see Blaker, 2000, Corollary 1). This property does not hold for the two-sided Fisher's exact test. Although most of the time p-values from the central Fisher's exact test are larger than those of the two-sided Fisher's exact test, this is not always true (see Figure 1b).

For the central tests and matching intervals, besides the interpretational advantage of being central intervals, additionally the p-value function of the central test is continuous and unimodal in  $\beta_0$ . So the calculation of the confidence interval is easier and all inversion confidence sets are intervals. Further, the central Fisher's exact test avoids the following difficulty, which was discussed in Vos and Hudson (2008) for other discrete tests: it is possible that small changes in the data in the direction *away* from the null can lead to *less* significant tests. Let us modify the invented data so that 2 more individuals were observed with no events in the first group, giving proportions:  $7/264=2.65\%$  and  $30/494=6.07\%$ . This is clearly further away from the null than the original example, since the first group, which had the lower event rate in the original example, has an even lower one when those two individuals are added. The two-sided Fisher's exact p-value moves from significance for the original example ( $p_1(\mathbf{x}) = 0.04996$ ) to non-significance with the 2 added individuals ( $p_1(\mathbf{x}) = 0.05005$ ). Although the same phenomena can occur with Blaker's exact test and often the Blaker p-values equal those of the two-sided Fisher's exact test, in this modified example the Blaker p-value is different, ( $p_1(\mathbf{x}) = 0.0356$ ). Unlike the two-sided Fisher's exact p-values, the p-values from the central Fisher's exact test properly show the ordering, giving a larger p-value for the original data set ( $p_1(\mathbf{x}) = 0.0518$ ) than the modified one ( $p_1(\mathbf{x}) = 0.0493$ ).

Table 2. Exact Two-sided Tests with Matching Confidence Intervals on Data from Lim, et al (2009)

| symptom            | Odds Ratio* | Fisher's Two-Sided |          |       | Central Fisher |          |        | Blaker's Exact |          |       |
|--------------------|-------------|--------------------|----------|-------|----------------|----------|--------|----------------|----------|-------|
|                    |             | p                  | 95% C.I. |       | p              | 95% C.I. |        | p              | 95% C.I. |       |
| Tremors            | 10.85       | 0.113              | 0.42     | 89.89 | 0.226          | 0.21     | 119.89 | 0.113          | 0.42     | 89.89 |
| Vomitting/Diarrhea | 3.46        | 0.035              | 1.11     | 11.14 | 0.071          | 0.90     | 11.46  | 0.035          | 1.11     | 11.27 |
| Abdominal Pain     | 4.12        | 0.032              | 1.17     | 14.17 | 0.063          | 0.92     | 14.58  | 0.032          | 1.17     | 14.22 |

\* Odds ratio calculated by conditional maximum likelihood.

#### REFERENCES

- AGRESTI, A. (1990). *Categorical Data Analysis* Wiley: New York.
- AGRESTI, A. (2001). Exact inference for categorical data: recent advances and continuing controversies *Statistics in Medicine*. **20**: 2709–2722.
- AGRESTI, A. AND MIN, Y. (2001). On Small-sample Confidence Intervals for Parameters in Discrete Distributions, *Biometrics*, **57**: 963–971.
- BAPTISTA, J. AND PIKE, M.C. (1977). Exact two-sided confidence limits for the odds ratio in a  $2 \times 2$  table. *Journal of the Royal Statistical Society, Series C* **26** 214–220.
- BLAKER, H. (2000). Confidence curves and improved exact confidence intervals for discrete distributions *Canadian Journal of Statistics* **28**: 783–798.
- BLAKER, H. AND SPJØTVOLL, E. (2000). Paradoxes and improvements in interval estimation. *American Statistician* **54**: 242–247.
- CASELLA, G. AND BERGER, R.L. (2002). *Statistical Inference, second edition*. Duxbury: Pacific Grove, CA.
- CORNFIELD, J. (1956). A statistical problem arising from retrospective studies. *Proceedings of the Third Berkeley Symposium on Mathematical Statistics and Probability* **4**: 135–148.
- DAVIS, L.J. (1986). Exact Tests for  $2 \times 2$  Contingency Tables. *American Statistician* **40**: 139–141.
- FOG, A. (2008). Sampling methods for Wallenius' and Fisher's Noncentral Hypergeometric Distributions. *Communications in Statistics-Simulation and Computation* **37**: 241–257.
- GIBBONS, J.D. AND PRATT, J.W. (1975). P-values: Interpretation and Methodology *American Statistician* **29**: 20–25.
- LEHMANN, E.L., AND ROMANO, J.P. (2005). *Testing Statistical Hypotheses, third edition* Springer: New York.

- LIM, J.K., MCDERMOTT, D.H., LISCO, A., FOSTER, G.A., KRYSZTOF, D., FOLLMANN, D., STRAMER, S.L., MURPHY, P.M. (2009). CCR5 Deficiency is a Risk Factor for Early Clinical Manifestations of West Nile Virus Infection, but not for Infection per se (to appear in *Journal of Infectious Diseases*).
- LIAO, J.G., AND ROSEN, O. (2001). Fast and stable algorithms for computing and sampling from the noncentral hypergeometric distribution. *American Statistician* **55**: 366–369.
- MEHTA, C.R., PATEL, N.R., AND GRAY, R. (1985). Computing an exact confidence interval for the common odds ratio in several  $2 \times 2$  contingency tables. *Journal of the American Statistical Association* **80**: 969–973.
- MOHER, D., SCHULTZ, K.F., AND ALTMAN, D.G. (2001). The CONSORT statement: revised recommendations for improving the quality of reports of parallel group randomized trials. *BMC Medical Research Methodology* **1**: 2.
- StatXact 8 Procs User Manual (2007). Cytel Software Corporation: Cambridge MA.
- TOCHER, K.D. (1950). Extension of the Neyman-Pearson Theory of Tests to Discontinuous Variates *Biometrika* **37**: 130–144.
- VOS, P.W., AND HUDSON, S. (2008). Problems with binomial two-sided tests and the associated confidence intervals *Australian and New Zealand Journal of Statistics* **50**: 81–89.
- YATES, F. (1984). Test of significance for  $2 \times 2$  contingency tables. (with discussion) *Journal of the Royal Statistical Society, Series A* **147**: 426–463.
